# Supplementary material for: Single-Cell Expression Landscape of SARS-CoV-2 Receptor ACE2 and Host Proteases in Normal and Malignant Lung Tissues from Pulmonary Adenocarcinoma Patients
Source: Cancers (Basel). 2021 Mar 12;13(6):1250. doi: 10.3390/cancers13061250 (PMC7998226; doi:10.3390/cancers13061250)

# **Single-cell expression landscape of SARS-CoV-2 receptor *ACE2* and host proteases in human lung adenocarcinoma**

## ***ONLINE DATA SUPPLEMENT***

### **SUPPLEMENTARY METHODS**

#### **Single-cell derivation and sorting**

Following surgery, sample collection was performed by an experienced pathologist assistant (PB) starting with 2-3 normal lung tissues first and followed by the tumor sample, to minimize cross-contamination during collection. Normal samples were collected from up to 100 mm away from the tumor edge, and all sample sizes were in the range of 0.1 – 1 mm<sup>3</sup>. Samples were immediately placed in ice-cold RPMI medium supplemented with 2% fetal bovine serum (FBS) and transported on ice for further processing. Tissues were washed in ice-cold Hank's balanced salt solution (HBSS) and extra-pulmonary airways and connective tissue was removed with scissors. Samples were transferred to dish on ice for mincing into 1mm<sup>3</sup> pieces and subsequent enzymatic digestion at 37°C with gentle rotation. Samples were digested in 3 ml of a cocktail containing Collagenase A (Sigma Aldrich), Collagenase IV (Thermo Fisher Scientific), DNase I, (Sigma Aldrich), Dispase II (Sigma Aldrich), Elastase 1 (Thermo Fisher Scientific) and Pronase (Sigma Aldrich), as previously described [1]. 10 minutes into the digestion reaction, the digest was mixed for further disaggregation, followed by an additional 10 min incubation at 37°C. Samples were then filtered, washed with ice-cold HBSS, and centrifuged. Red blood cells (RBCs) were removed from the cell pellet by incubation in ice-cold ACK lysis buffer (A1049201, Thermo Fisher Scientific). RBC lysis reaction was stopped by adding ice-cold FBS, and samples were centrifuged and re-suspended in ice-cold phosphate-buffered saline (PBS) with 2% FBS,

filtered, and cells from patients 2 - 5 (P2-P5) were additionally stained with anti-EPCAM-PE (347198, BD Biosciences; 1:50 dilution) for 30 minutes with gentle rotation at 4°C. Cells from all patients were washed, stained with SYTOX Blue viability dye (S34857, Life Technologies) in PBS 2% FBS, and processed on a fluorescence activate cell sorting (FACS) Aria I instrument. Viable singlets (SYTOX Blue negative, P1), or EPCAM+ and EPCAM- viable singlets (P2-P5) were sorted into PBS 2% FBS, and immediately washed, filtered and enumerated by Trypan Blue before loading individual fractions on 10X Chromium Next GEM Chips G (1000127, 10X Genomics) according to manufacturer's instructions.

### **Preparation of single-cell gene expression libraries**

Gel beads-in-emulsion (GEMs) generated using Chromium Next GEM Single Cell 5' Gel Bead Kit v1.1 (1000169, 10X Genomics) were recovered from individual chip channels and single-cell 5' gene expression libraries were constructed using the Chromium Next GEM Single Cell 5' Library kit (1000166, 10X Genomics) according to the manufacturer's protocol. 10X-barcoded full-length cDNA was recovered from the barcoded GEMs following dissociation and magnetic bead clean-up (Dynabeads MyOne Silane, Thermo Fisher Scientific). Following PCR amplification of cDNA and quality control (QC) using Bioanalyzer High Sensitivity DNA kit (Agilent), up to 50 ng of amplified cDNA was used to construct gene expression libraries. cDNA was enzymatically fragmented, size-selected, and subject to end-repair, A-tailing, adaptor ligation, and sample index PCR using Single Index Kit T Set A (10X Genomics). Illumina-ready barcoded gene expression libraries were assessed using Bioanalyzer High Sensitivity DNA kit (Agilent) and Qubit dsDNA High Sensitivity Assay Kit (Thermo Fisher Scientific), pooled, denatured and diluted as recommended for sequencing on the Illumina NovaSeq 6000 platform.

### **scRNA-seq data quality control**

Detailed QC metrics including UMI count per barcode, number of genes detected and mitochondrial gene rate, were generated and evaluated. Genes detected in < 3 cells and cells where < 200 genes had non-zero counts were filtered out and excluded from subsequent analysis. Low quality cells where >15% of the read counts originated from the mitochondrial genome were also discarded. In addition, cells with >6,000 detected genes were discarded to remove likely doublet or multiplet captures. Possible batch effects were evaluated and corrected using Harmony [2].

### **TCGA data analysis**

Expression analysis of select genes was done in bulk mRNA-seq expression dataset (normalized) of primary LUADs with matched normal lung tissues (n = 52) generated by The Cancer Genome Atlas (TCGA) Program on LUAD [3] and downloaded from the NCI Cancer Genomic Data Commons (NCI-GDC: <https://gdc.cancer.gov>). The mRNA-seq expression data were processed and normalized by the NCI-GDC bioinformatics team using their transcriptome analysis pipeline. Deconvolution of AT2 cell abundance in TCGA LUAD cohort was performed by incorporating AT2 signature genes defined by our study into MCP-counter, an R package that permits the quantification of the absolute abundance of cell populations in heterogeneous tissues from transcriptome data [4].

## SUPPLEMENTARY TABLES

**Table S1: Clinicopathological variables of the LUAD patients analyzed by scRNA-seq**

| <b>Patient (P)</b> | <b>LUAD stage</b> | <b>Histological pattern</b>     | <b>Age</b> | <b>Sex</b> | <b>Ethnicity</b>   | <b>Losartan treatment</b> |
|--------------------|-------------------|---------------------------------|------------|------------|--------------------|---------------------------|
| P1                 | IIIA              | acinar adenocarcinoma           | 70         | Female     | White or Caucasian | Yes                       |
| P2                 | IB                | invasive mucinous adnocarcinoma | 73         | Female     | White or Caucasian | Yes                       |
| P3                 | IIIA              | invasive mucinous adnocarcinoma | 58         | Female     | White or Caucasian | No                        |
| P4                 | IIB               | acinar adenocarcinoma           | 64         | Female     | White or Caucasian | No                        |
| P5                 | IB                | papillary adenocarcinoma        | 71         | Male       | White or Caucasian | Yes                       |

*LUAD: lung adenocarcinoma*

**Table S2: Cell numbers of total and ACE2+ cells in epithelial subclusters**

| <b>Cluster</b>      | <b>Cell Number</b> | <b>ACE2+ Cells</b> |
|---------------------|--------------------|--------------------|
| Alveolar progenitor | 5516               | 41                 |
| AT1                 | 10775              | 31                 |
| AT2                 | 27235              | 607                |
| Basal               | 5119               | 49                 |
| Bronchioalveolar    | 2336               | 6                  |
| Ciliated            | 3247               | 18                 |
| Club and secretory  | 4624               | 110                |
| Ionocyte            | 64                 | 0                  |
| Proliferating basal | 447                | 10                 |
| Malignant-enriched  | 10704              | 370                |

AT1: alveolar type 1; AT2: alveolar type 2



## SUPPLEMENTARY REFERENCES

1. Slyper, M., et al., *A single-cell and single-nucleus RNA-Seq toolbox for fresh and frozen human tumors*. Nature Medicine, 2020. **26**(5): p. 792-802.
2. Korsunsky, I., et al., *Fast, sensitive and accurate integration of single-cell data with Harmony*. Nat Methods, 2019. **16**(12): p. 1289-1296.
3. Cancer Genome Atlas Research, N., *Comprehensive molecular profiling of lung adenocarcinoma*. Nature, 2014. **511**(7511): p. 543-50.
4. Becht, E., et al., *Dimensionality reduction for visualizing single-cell data using UMAP*. Nat Biotechnol, 2018.

## SUPPLEMENTARY FIGURE LEGENDS

### **Figure S1. Single-cell expression of *ACE2*, *TMPRSS2*, and *TMPRSS4* in cycling lung cells.**

Uniform manifold approximation and projection (UMAP) embedding showing cycling lung cells from all 19 samples (35 single-cell expression libraries). Cells are color-coded by expression level of *ACE2*, *TMPRSS2*, or *TMPRSS4*.

**Figure S2. Single-cell clustering of lung epithelial cells and analysis of *ACE2*, *TMPRSS2*, and *TMPRSS4* expression in normal versus tumor LUAD TCGA samples. A**, Bubble plots showing cell fractions with scaled expression of airway lineage markers for the identified lung epithelial cell clusters. **B**, UMAP plot of all epithelial cells labeled by sample type. **C**, Analysis of *ACE2*, *TMPRSS2*, and *TMPRSS4* expression in matched tumor and normal samples from TCGA LUAD cohort. LUAD: lung adenocarcinoma; AT1: alveolar type 1; AT2: alveolar type 2

### **Figure S3. Single-cell expression of *ACE2*, *TMPRSS2*, and *TMPRSS4* in AT2 subclusters.**

**A**, UMAP showing unsupervised clustering of AT2 cells. Cells are colored by assigned AT2 subcluster. **B-D**, Bar plots showing fraction of AT2 cells (percentage of each cluster) expressing *ACE2* (**B**), *TMPRSS2* (**C**) and *TMPRSS4* (**D**) among AT2 clusters with highest fractions of cells positive for each gene. Absolute number of cells positive for each gene and within each analyzed AT2 cluster are indicated on top of the corresponding bars. Color indicates average expression in AT2 cells positive for the gene of interest.

**Figure S4. Single-cell expression of *ACE2* in AT2 and malignant-enriched subsets of losartan-treated versus untreated patients. A**, Bar plots showing *ACE2* expression frequency and levels in AT2 or malignant-enriched subsets and in losartan-treated versus untreated patients. Color indicates average expression in cells positive for *ACE2*. **B**, Violin plots showing

significant up-regulation of *ACE2* expression in *ACE2*<sup>+</sup> AT2 or malignant-enriched cells of losartan-treated patients compared to untreated patients. FC: Fold change.

**Figure S5. Single-cell expression of *DMBT1* and the coronavirus receptors *BSG* and *DPP4* in lung epithelial cells. A-B** Bar plots showing expression frequency and levels of *DMBT1*, *BSG*, and *DPP4* in the 10 identified lung epithelial cell clusters **(A)** and among the 5 AT2 clusters **(B)**.

**Figure S6. Correlations between estimated AT2 cell fractions and *ACE2*, *DMBT1*, *TMPRSS2*, and *TMPRSS4* in TCGA normal lung samples of stage I or stages II and III LUADs.** Correlations were statistically analyzed using Pearson's correlation coefficient.

Figure S1

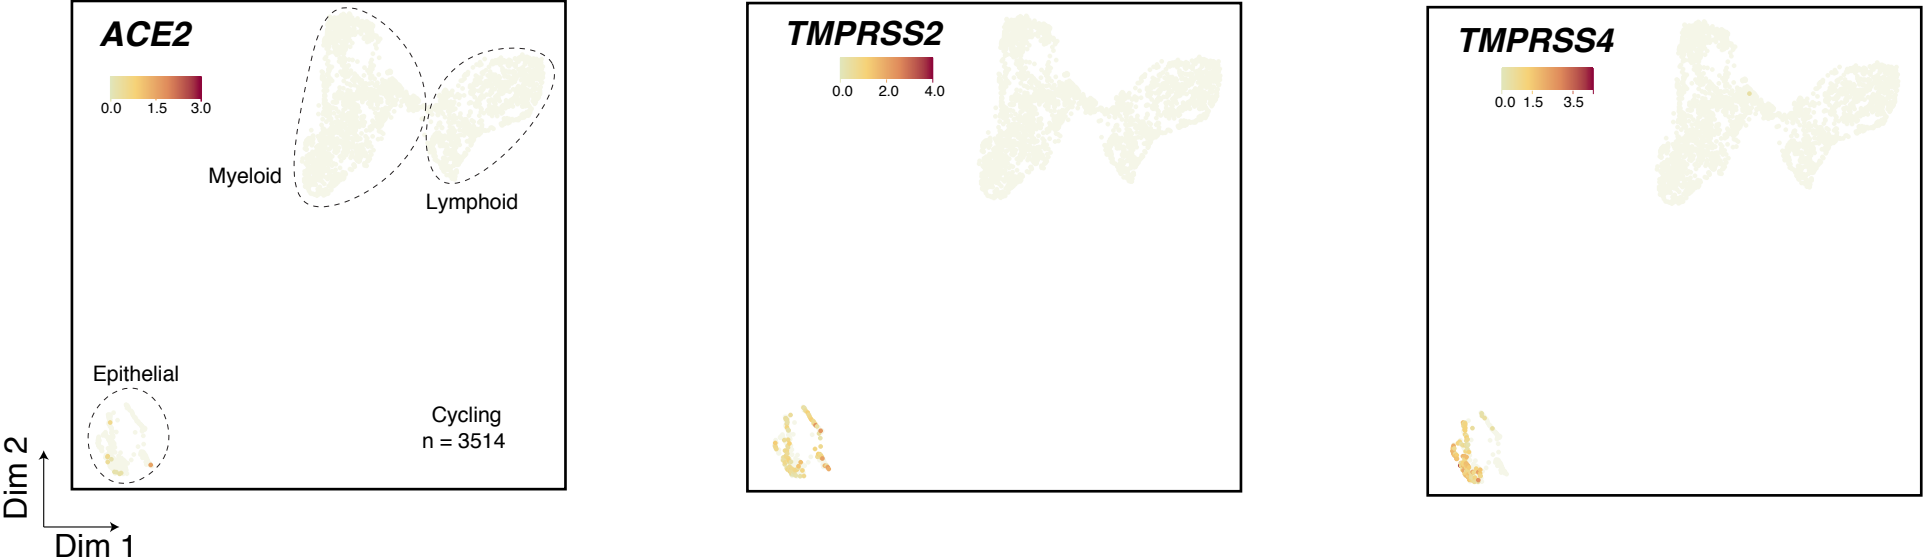

# Figure S2

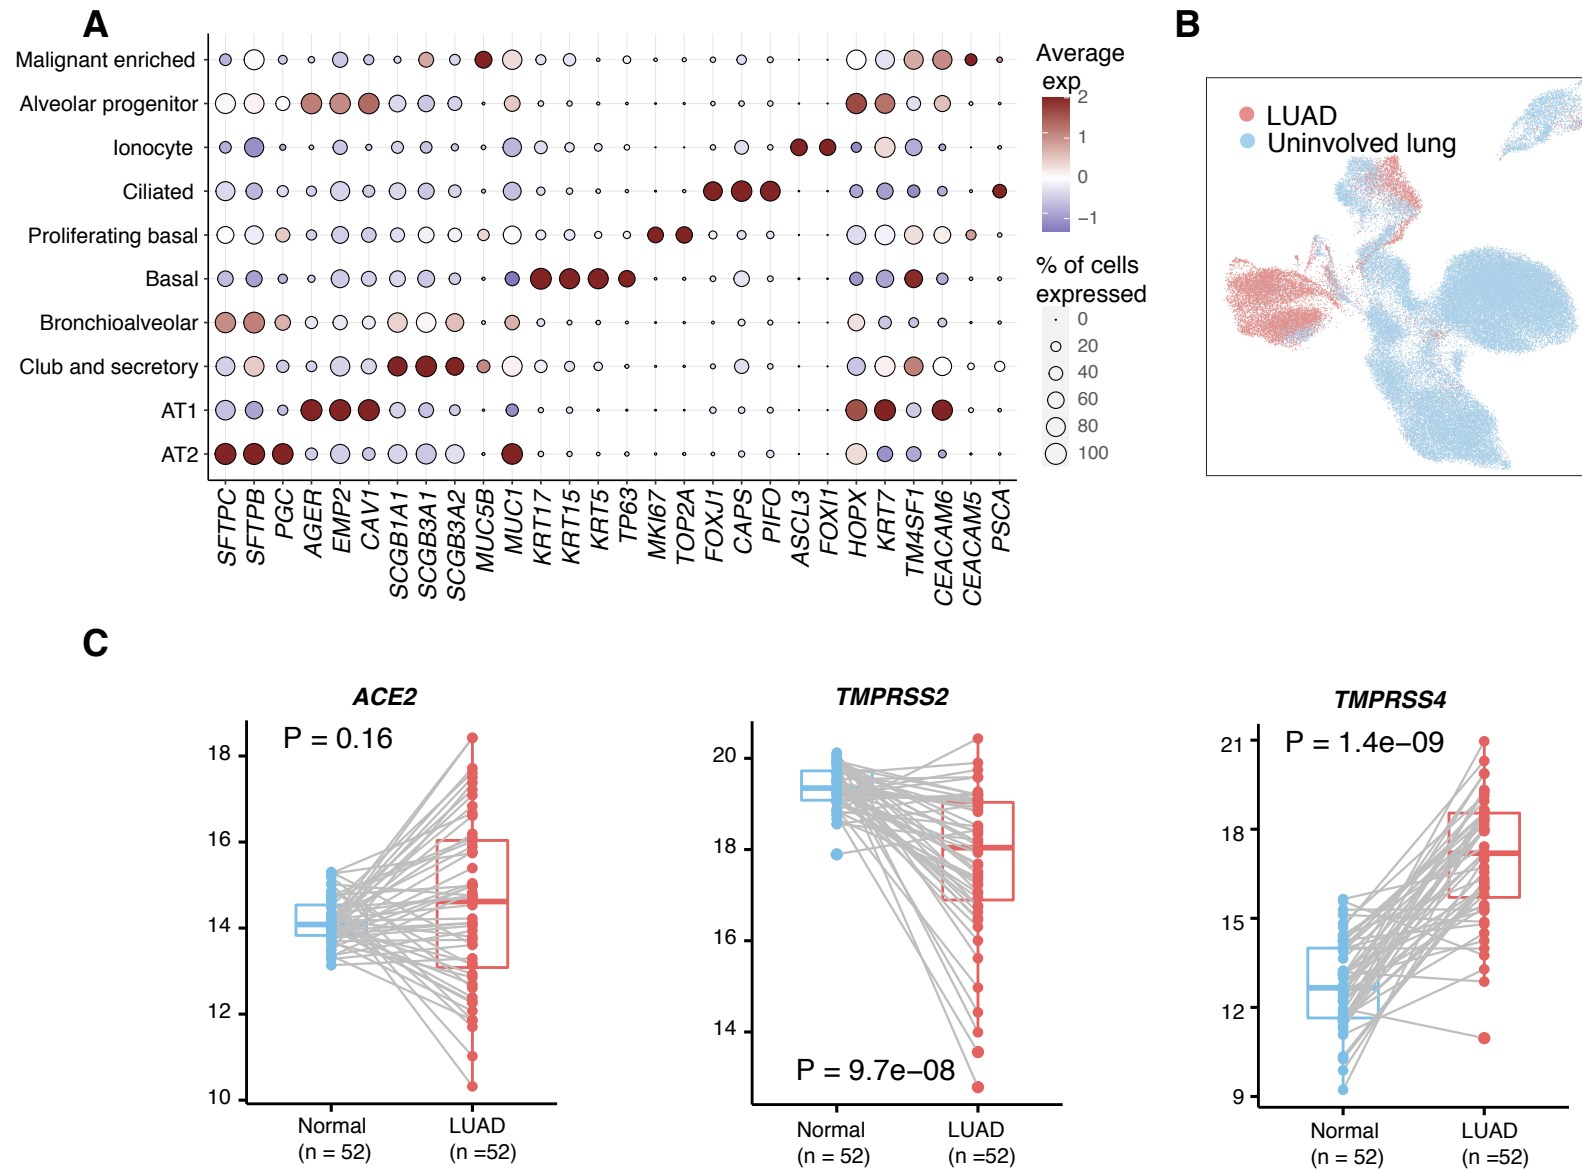

Figure S3

A

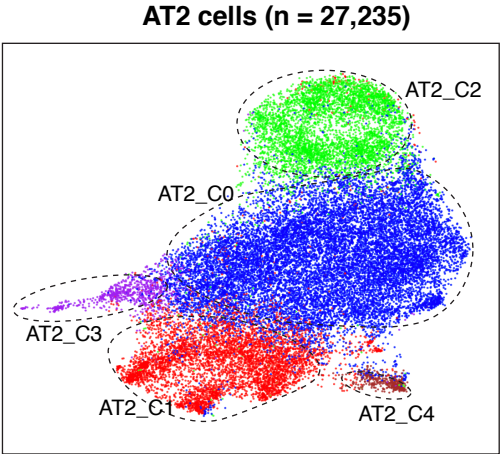

B

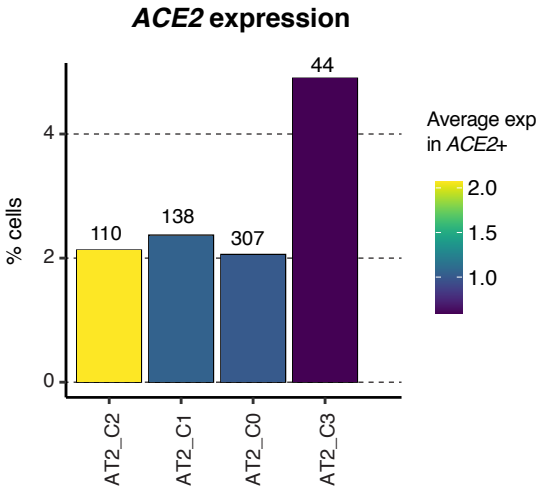

C

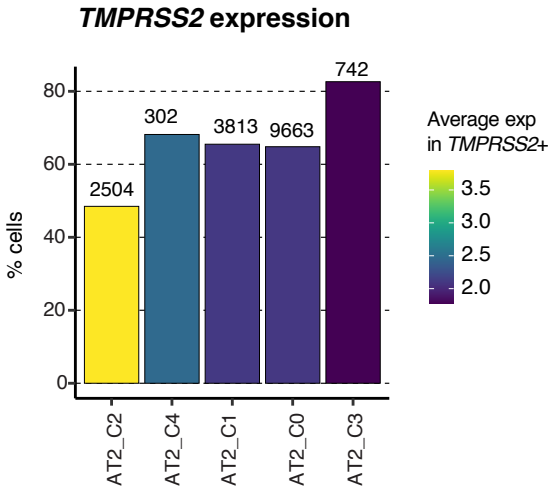

D

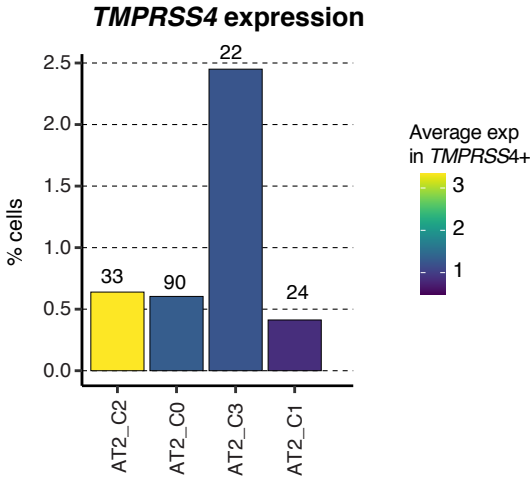

Figure S4

A

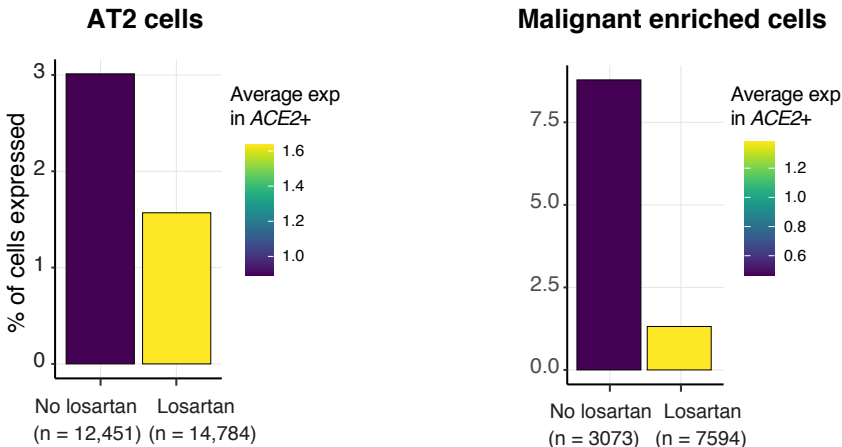

B

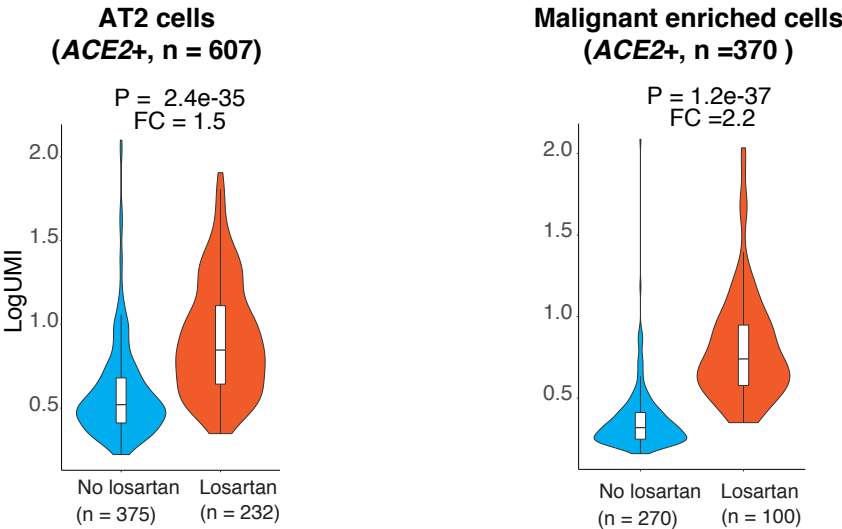

Figure S5

**A**

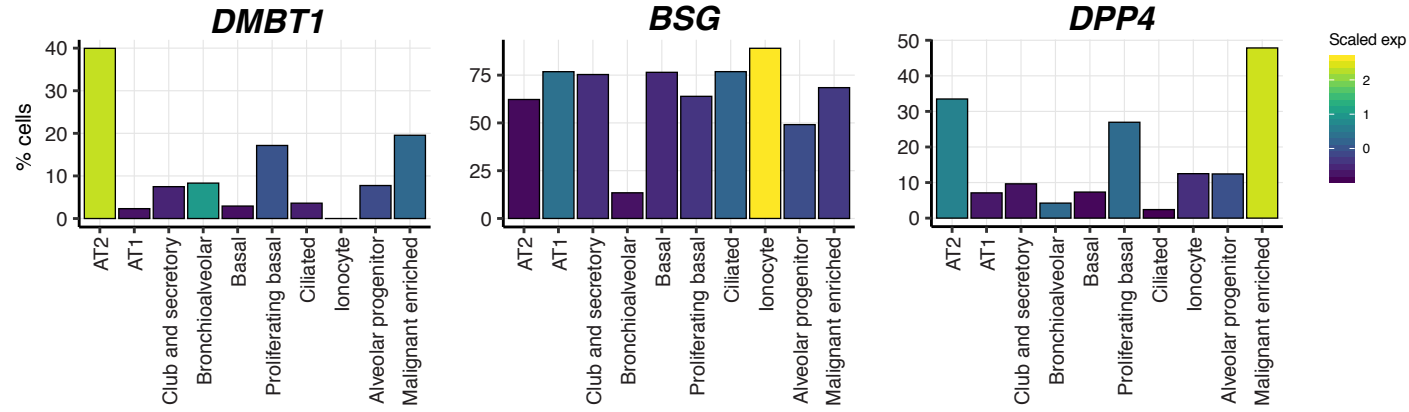

**B**

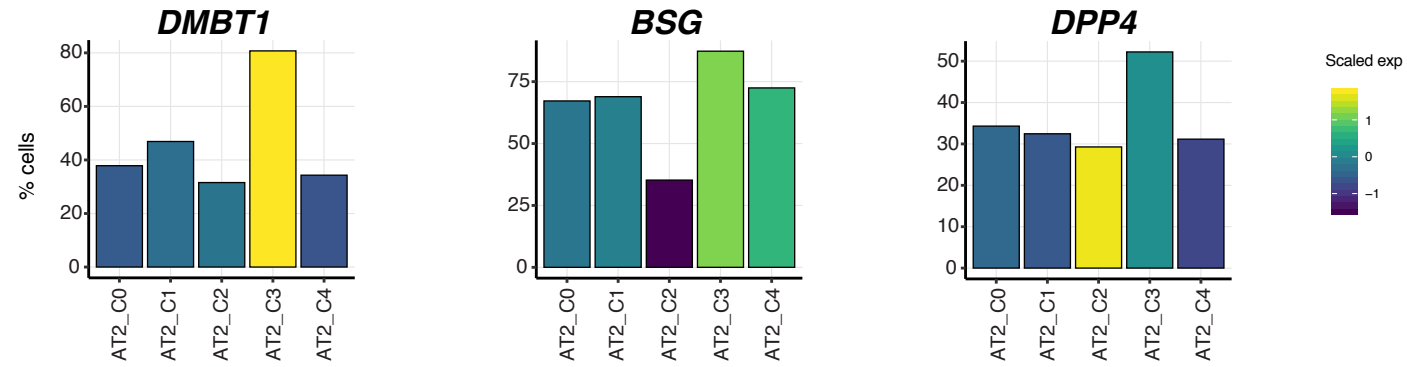

Figure S6

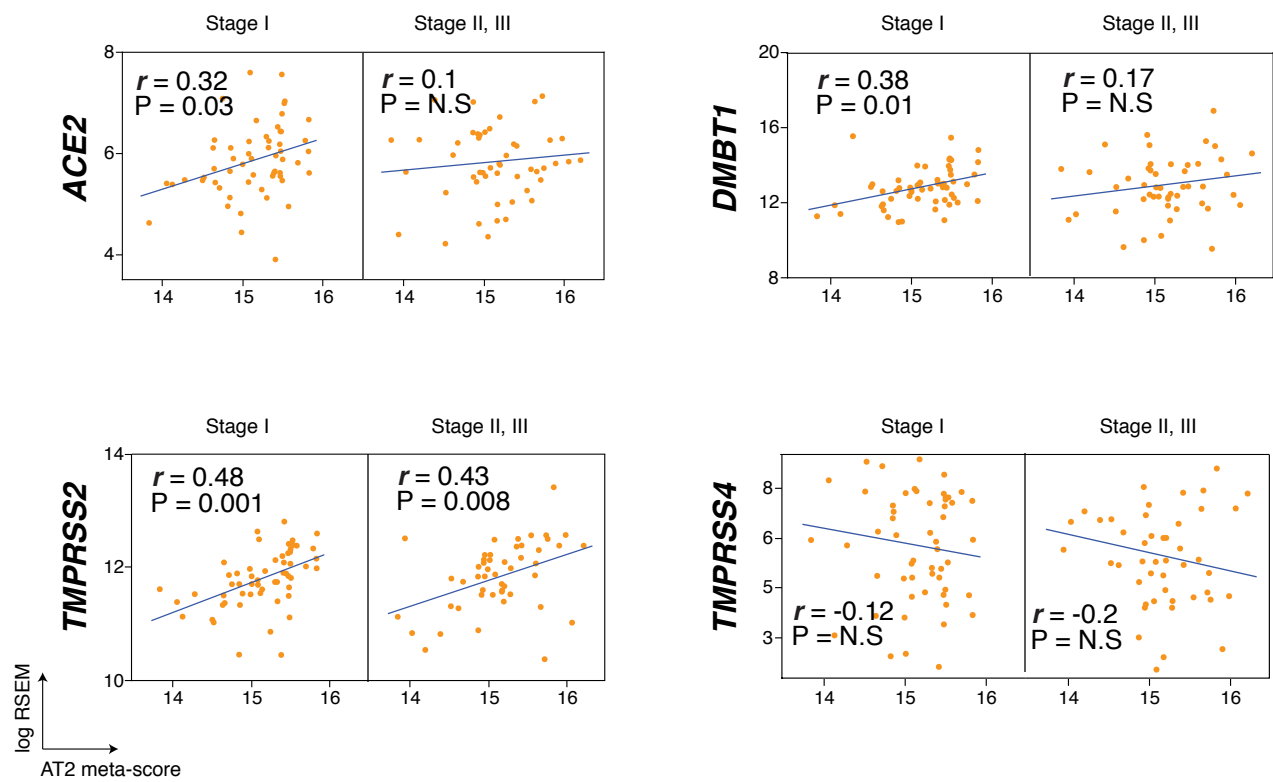

Supplement: Supplementary file 1 [file cancers-13-01250-s001.pdf]
